# Supplementary material for: Cost of surviving sepsis: a novel model of recovery from sepsis in Drosophila melanogaster
Source: PubMed Central journal article supplement (PMC4720623; doi:10.1186/s40635-016-0075-4), 2016-01-21

S1

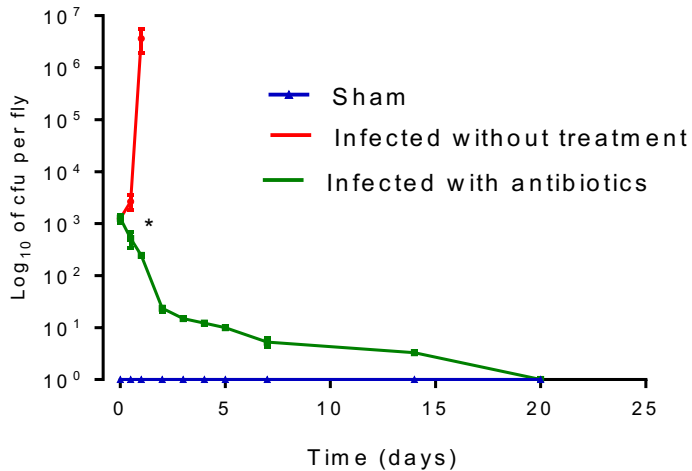

Supplement: 40635_2016_75_MOESM1_ESM.pdf [file 40635_2016_75_MOESM1_ESM.pdf]
